# Supplementary material for: Ruthenium doping in the MoS2/AB heterostructure for the hydrogen evolution reaction in acidic media
Source: Royal Society of Chemistry journal article supplement (doi:10.1039/d3dt00309d), 2023-01-01
Supplement: d3dt00309d1.pdf [file d3dt00309d1.pdf]

## Supplementary Information

### **Ruthenium doping in MoS<sub>2</sub>/AB heterostructure for hydrogen evolution reaction in acid media**

*Haowen Ren<sup>1</sup>, Shihong Chen<sup>1</sup>, Chong Chen<sup>1</sup>, Yang Qiu<sup>1</sup>, Chunhui Luo<sup>1</sup>, Qiang Zhao<sup>1\*</sup>, Wei Yang<sup>2\*</sup>*

<sup>1</sup> School of Chemical Engineering, Sichuan University, Chengdu 610065, CHINA.

<sup>2</sup> State Key Laboratory of Hydraulics and Mountain River Engineering, College of Water Resource & Hydropower, Sichuan University, Chengdu 610065, CHINA.

\*Corresponding Author : Wei Yang, Email: [wei\\_yang@scu.edu.cn](mailto:wei_yang@scu.edu.cn); Qiang Zhao, Email: [scuzq@scu.edu.cn](mailto:scuzq@scu.edu.cn)

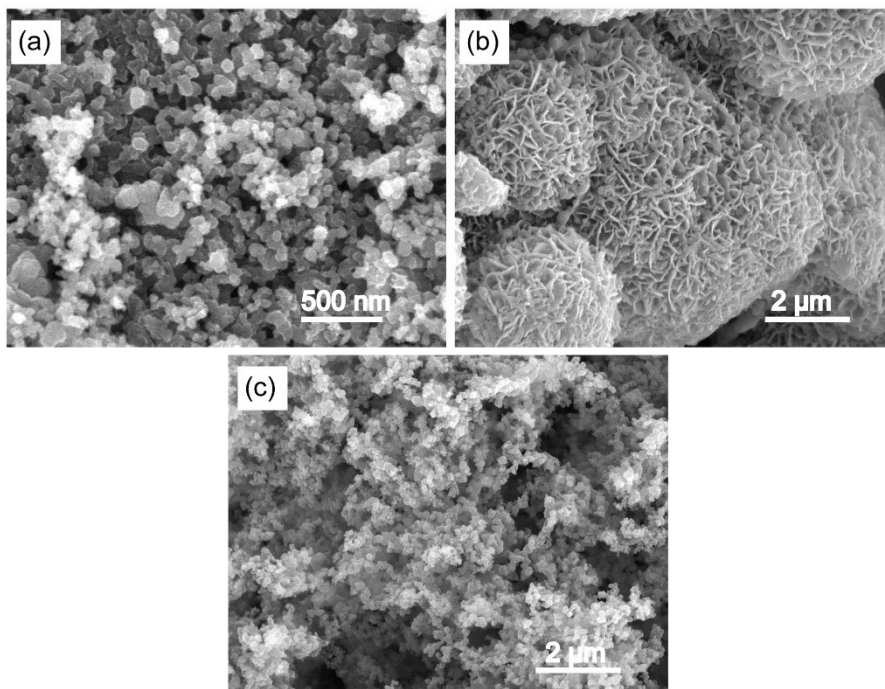

**Fig.S1** SEM of (a) AB, (b) Ru-MoS<sub>2</sub>, (c) Ru-AB.

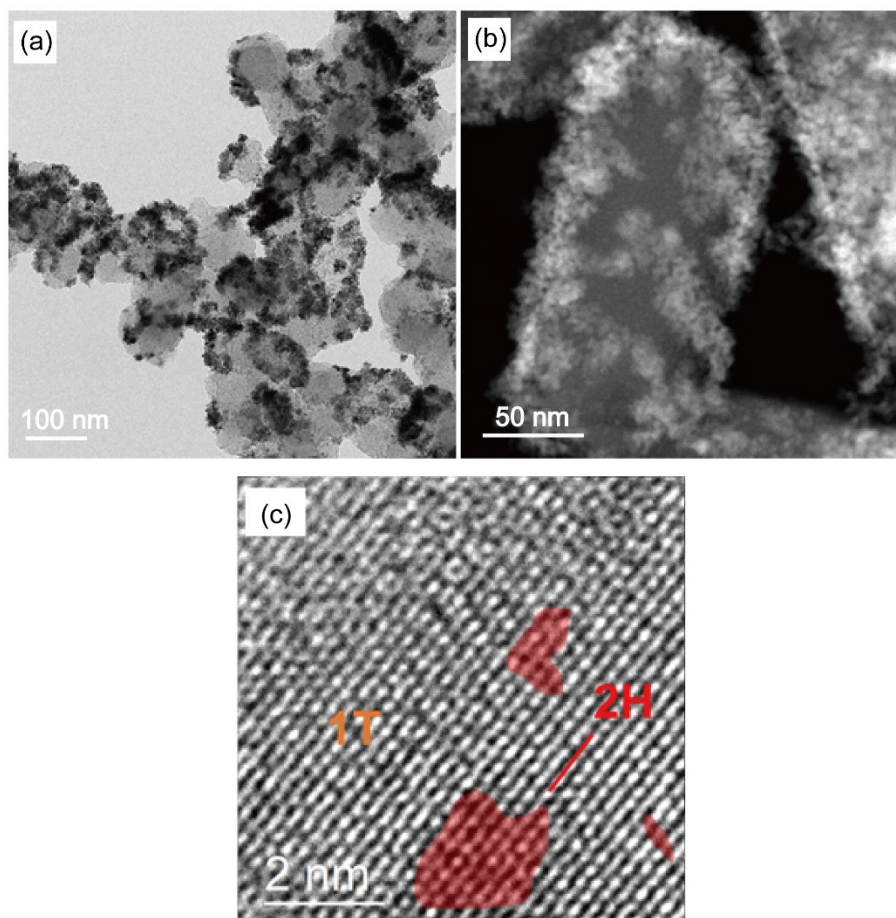

**Fig.S2** (a) TEM, (b) HAADF and (c) HRTEM images of Ru-MoS<sub>2</sub>/AB.

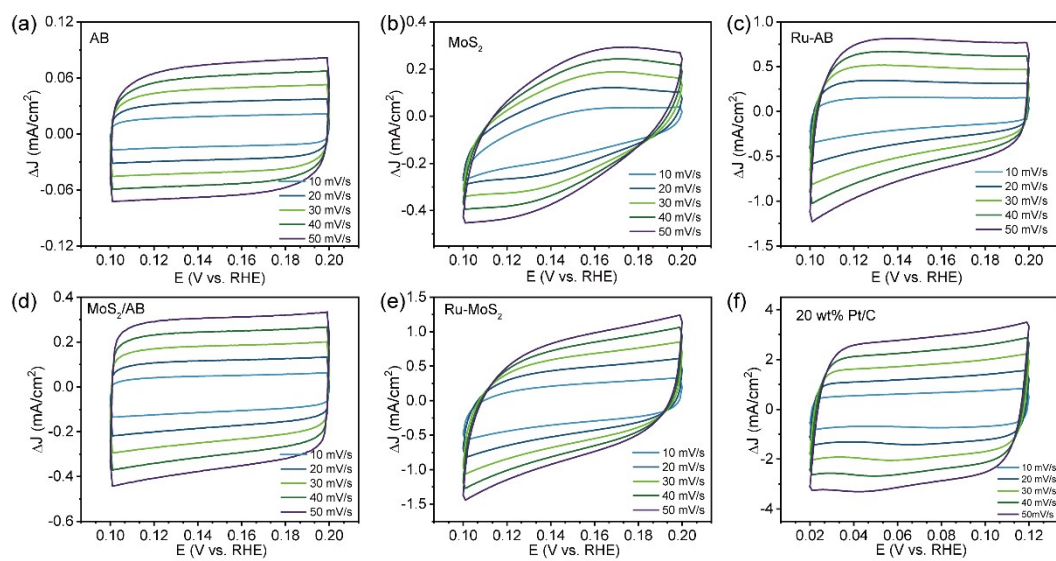

**Fig.S3** CV curves at different various scan rates of (a) AB, (b)  $\text{MoS}_2$ , (c) Ru-AB, (d)  $\text{MoS}_2/\text{AB}$ , (e) Ru- $\text{MoS}_2$  and (f) Pt/C (20%) in 0.5 M  $\text{H}_2\text{SO}_4$  solution at the potential range of 0.1~0.2 V (vs. RHE).

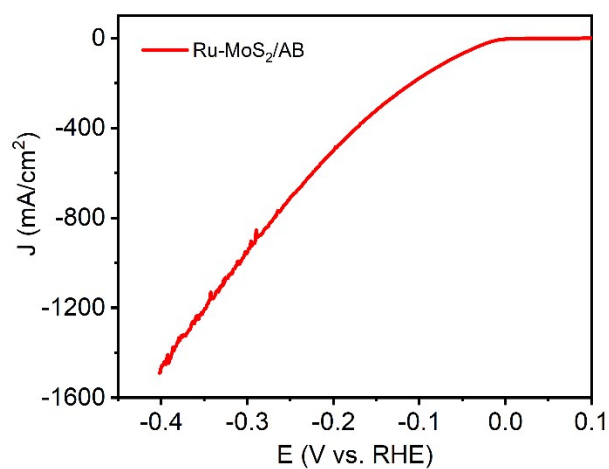

**Fig. S4** LSV curve of Ru- $\text{MoS}_2/\text{AB}$  in 0.5 M  $\text{H}_2\text{SO}_4$ .

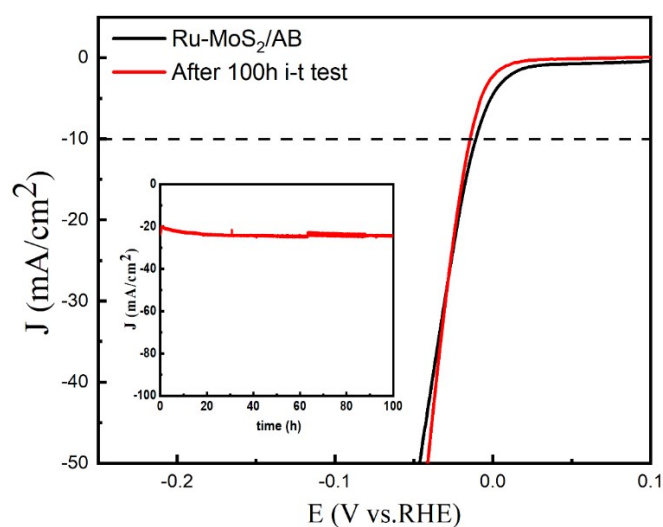

**FigS5** Durability tests of Ru-MoS<sub>2</sub>/AB for 100 h.

**Table S1** Comparison of MoS<sub>2</sub>-based and Ru-based electrocatalysts for HER

| Sample                                                   | Electrolyte                          | $\eta_{10}$ (mV)     | Tafel (mV·dec <sup>-1</sup> ) | Ref.      | Year |
|----------------------------------------------------------|--------------------------------------|----------------------|-------------------------------|-----------|------|
| MoS <sub>2</sub> /ACET-Ru                                | 0.5 M H <sub>2</sub> SO <sub>4</sub> | 12.6                 | 31                            | This work |      |
| B-Ru@CNT                                                 | 0.5 M H <sub>2</sub> SO <sub>4</sub> | -62                  | 82                            | 1         | 2022 |
| E-MoS <sub>2</sub> -Pt-r                                 | 0.5 M H <sub>2</sub> SO <sub>4</sub> | -38                  | 29                            | 2         | 2022 |
| Ru@Co/N-CNTs-2                                           | 0.5 M H <sub>2</sub> SO <sub>4</sub> | -92                  | 45                            | 3         | 2020 |
| Co-Ru-MoS <sub>2</sub>                                   | 1 M KOH                              | -52                  | 55                            | 4         | 2020 |
| Ru/C-H <sub>2</sub> O/CH <sub>3</sub> CH <sub>2</sub> OH | 0.5 M H <sub>2</sub> SO <sub>4</sub> | -35                  | 36.2                          | 5         | 2019 |
| Ru1-GC                                                   | 1 M H <sub>2</sub> SO <sub>4</sub>   | -20                  | 29                            | 6         | 2018 |
| Ru/MoS <sub>2</sub>                                      | 0.5 M H <sub>2</sub> SO <sub>4</sub> | -96                  | -                             | 7         | 2017 |
| Rh-MoS <sub>2</sub>                                      | 0.5 M H <sub>2</sub> SO <sub>4</sub> | -47                  | 24                            | 8         | 2017 |
| Ru-MoS <sub>2</sub> /CL                                  | 0.5 M H <sub>2</sub> SO <sub>4</sub> | -50                  | 46                            | 9         | 2020 |
| MoS <sub>2</sub> /Mo                                     | 0.5 M H <sub>2</sub> SO <sub>4</sub> | -242                 | 44.7                          | 10        | 2016 |
| N,Pt-MoS <sub>2</sub>                                    | 1 M KOH                              | -38                  | 39                            | 11        | 2022 |
| Ru@C <sub>2</sub> N                                      | 0.5 M H <sub>2</sub> SO <sub>4</sub> | -13.5                | 30                            | 12        | 2017 |
| Ru SASs+NPs/NG                                           | 1 M KOH                              | -12                  | 36.6                          | 13        | 2022 |
| Co1Ru@Ru/CNx                                             | 1 M KOH                              | -30                  | 42                            | 14        | 2022 |
| Ru/C-TiO <sub>2</sub>                                    | 1 M KOH                              | -44                  | 73.7                          | 15        | 2020 |
| Ru-NMCNs-500                                             | 1 M KOH                              | -28                  | 35.2                          | 16        | 2020 |
| NRAS                                                     | 1 M KOH                              | -72                  | 193                           | 17        | 2020 |
| Ru-Mo <sub>2</sub> C/CN                                  | 1 M KOH                              | -34                  | 80                            | 18        | 2020 |
| SA-Ru-MoS <sub>2</sub>                                   | 1 M KOH                              | -76                  | 21                            | 19        | 2019 |
| Ru-MoS <sub>2</sub> /CC                                  | 1 M KOH                              | -171( $\eta_{100}$ ) | 114                           | 20        | 2019 |
| Pd <sub>3</sub> Ru                                       | 1 M KOH                              | -104                 | -                             | 21        | 2019 |
| Cu@MoS <sub>2</sub>                                      | 1 M KOH                              | -131                 | 51                            | 22        | 2019 |

**References:**

1. X. Sun, W. Li, J. Chen, X. Yang, B. Wu, Z. Wang, B. Li and H. Zhang, *J Colloid Interface Sci*, 2022, **616**, 338–346.
2. Y. Li, S. Wang, Y. Hu, X. Zhou, M. Zhang, X. Jia, Y. Yang, B.-L. Lin and G. Chen, *J Mater Chem A*, 2022, **10**, 5273–5279.
3. Z. Liu, X. Yang, G. Hu and L. Feng, *ACS Sustainable Chemistry & Engineering*, 2020, **8**, 9136–9144.
4. I. S. Kwon, T. T. Debela, I. H. Kwak, Y. C. Park, J. Seo, J. Y. Shim, S. J. Yoo, J. G. Kim, J. Park and H. S. Kang, *Small*, 2020, **16**.
5. Y. Li, J. Abbott, Y. Sun, J. Sun, Y. Du, X. Han, G. Wu and P. Xu, *Applied Catalysis B: Environmental*, 2019, **258**.
6. J. Creus, S. Drouet, S. Suriñach, P. Lecante, V. Collière, R. Poteau, K. Philippot, J. García-Antón and X. Sala, *ACS Catalysis*, 2018, **8**, 11094–11102.
7. J. Liu, Y. Zheng, D. Zhu, A. Vasileff, T. Ling and S.-Z. Qiao, *Nanoscale*, 2017, **9**, 16616–16621.
8. Y. Cheng, S. Lu, F. Liao, L. Liu, Y. Li and M. Shao, *Advanced Functional Materials*, 2017, **27**.
9. Y. Xu, X. Jiang, G. Shao, H. Xiang, S. Si, X. Li, T. S. Hu, G. Hong, S. Dong, H. Li, Y. Feng and S. Liu, *Energy & Environmental Materials*, 2020, **4**, 117–125.
10. S. T. Finn and J. E. Macdonald, *ACS Appl Mater Interfaces*, 2016, **8**, 25185–25192.
11. Y. Sun, Y. Zang, W. Tian, X. Yu, J. Qi, L. Chen, X. Liu and H. Qiu, *Energy & Environmental Science*, 2022, DOI: 10.1039/d1ee03825g.
12. J. Mahmood, F. Li, S. M. Jung, M. S. Okyay, I. Ahmad, S. J. Kim, N. Park, H. Y. Jeong and J. B. Baek, *Nat Nanotechnol*, 2017, **12**, 441–446.
13. Z. Chen, W. Chen, L. Zheng, T. Huang, J. Hu, Y. Lei, Q. Yuan, X. Ren, Y. Li, L. Zhang, S. Huang, S. Ye, Q. Zhang, X. Ouyang, X. Sun and J. Liu, *Science China Chemistry*, 2022, **65**, 521–531.
14. X. Bao, Y. Chen, S. Mao, Y. Wang, Y. Yang and Y. Gong, *Energy & Environmental Materials*, 2022, DOI: 10.1002/eem2.12418.
15. Y. Wang, Q. Zhu, T. Xie, Y. Peng, S. Liu and J. Wang, *Chemelectrochem*, 2020, **7**, 1182–1186.
16. J. Peng, Y. Chen, K. Wang, Z. Tang and S. Chen, *Int J Hydrogen Energ*, 2020, **45**, 18840–18849.
17. A. Maiti and S. K. Srivastava, *ACS Appl Mater Interfaces*, 2020, **12**, 7057–7070.
18. J. Chen, C. Chen, Y. Chen, H. Wang, S. Mao and Y. Wang, *Journal of Catalysis*, 2020, **392**, 313–321.
19. J. Zhang, X. Xu, L. Yang, D. Cheng and D. Cao, *Small Methods*, 2019, **3**.
20. D. Wang, Q. Li, C. Han, Z. Xing and X. Yang, *Applied Catalysis B: Environmental*, 2019, **249**, 91–97.
21. X. Qin, L. Zhang, G.-L. Xu, S. Zhu, Q. Wang, M. Gu, X. Zhang, C. Sun, P. B. Balbuena, K. Amine and M. Shao, *ACS Catalysis*, 2019, **9**, 9614–9621.
22. L. Ji, P. Yan, C. Zhu, C. Ma, W. Wu, C. Wei, Y. Shen, S. Chu, J. Wang, Y. Du, J. Chen, X. Yang and Q. Xu, *Applied Catalysis B: Environmental*, 2019, **251**, 87–93.
